# Supplementary material for: The ‘cognitive footprint’ of psychiatric and neurological conditions: cross‐sectional study in the UK Biobank cohort
Source: PubMed Central journal article supplement (PMC5434825; doi:10.1111/acps.12733), 2017-04-07
Supplement: ACPS-135-593-s006.pdf [file ACPS-135-593-s006.pdf]

**Table S1** Additional Characteristics of the Exposed and Unexposed Groups

|                                                 | Unexposed comparison | Mania/bipolar |            | Major depression |              | Schizophrenia |            | Multiple sclerosis |            | Parkinson's disease |            |
|-------------------------------------------------|----------------------|---------------|------------|------------------|--------------|---------------|------------|--------------------|------------|---------------------|------------|
|                                                 |                      | Broad         | Narrow     | Broad            | Narrow       | Broad         | Narrow     | Broad              | Narrow     | Broad               | Narrow     |
| <i>n</i>                                        | 104,410              | 3,020         | 607        | 56,425           | 7,583        | 850           | 259        | 1,905              | 931        | 916                 | 323        |
| Ethnic group                                    |                      |               |            |                  |              |               |            |                    |            |                     |            |
| <i>n</i> (%) missing                            | 398 (0.4)            | 31 (1.0)      | 4 (0.7)    | 279 (0.5)        | 20 (0.3)     | 21 (2.5)      | 4 (1.5)    | 11 (0.6)           | 8 (0.9)    | 6 (0.7)             | 1 (0.3)    |
| White, <i>n</i> (%) <sup>a</sup>                | 94,798 (91.1)        | 2,727 (91.2)  | 563 (93.4) | 53,515 (95.3)    | 7,171 (94.8) | 719 (86.7)    | 221 (86.7) | 1,859 (98.2)       | 899 (97.4) | 876 (96.3)          | 310 (96.3) |
| Asian/Asian British                             | 3,643 (3.5)          | 84 (2.8)      | 6 (1.0)    | 887 (1.6)        | 144 (1.9)    | 24 (2.9)      | 8 (3.1)    | 5 (0.3)            | 4 (0.4)    | 15 (1.7)            | 6 (1.9)    |
| Black/black British                             | 3,121 (3.0)          | 84 (2.8)      | 13 (2.2)   | 718 (1.3)        | 108 (1.4)    | 49 (5.9)      | 17 (6.7)   | 11 (0.6)           | 5 (0.5)    | 8 (0.9)             | 1 (0.3)    |
| Other                                           | 2,450 (2.4)          | 94 (3.1)      | 21 (3.5)   | 1,026 (1.8)      | 140 (1.9)    | 37 (4.5)      | 9 (3.5)    | 19 (1.0)           | 15 (1.6)   | 11 (1.2)            | 5 (1.6)    |
| Townsend quintile <sup>b</sup>                  |                      |               |            |                  |              |               |            |                    |            |                     |            |
| <i>n</i> (%) missing                            | 157 (0.2)            | 3 (0.1)       | 1 (0.2)    | 101 (0.2)        | 19 (0.3)     | 3 (0.4)       | 1 (0.4)    | 4 (0.2)            | 2 (0.2)    | 2 (0.2)             | 1 (0.3)    |
| Qu1 (least deprived), <i>n</i> (%) <sup>a</sup> | 18,130 (17.4)        | 356 (11.8)    | 71 (11.7)  | 8,872 (15.8)     | 1,015 (13.4) | 33 (3.9)      | 8 (3.1)    | 382 (20.1)         | 181 (19.5) | 222 (24.3)          | 80 (24.8)  |
| Qu2                                             | 21,340 (20.5)        | 405 (13.4)    | 78 (12.9)  | 10,071 (17.9)    | 1,304 (17.2) | 48 (5.7)      | 11 (4.3)   | 382 (20.1)         | 173 (18.6) | 188 (20.6)          | 66 (20.5)  |
| Qu3                                             | 21,782 (20.9)        | 492 (16.3)    | 99 (16.3)  | 10,836 (19.2)    | 1,388 (18.4) | 75 (8.9)      | 19 (7.4)   | 389 (20.5)         | 190 (20.5) | 177 (19.4)          | 59 (18.3)  |
| Qu4                                             | 23,337 (22.4)        | 676 (22.4)    | 133 (22.0) | 12,380 (22.0)    | 1,663 (22.0) | 165 (19.5)    | 44 (17.1)  | 373 (19.6)         | 187 (20.1) | 167 (18.3)          | 53 (16.5)  |
| Qu5 (most deprived)                             | 19,664 (18.9)        | 1,088 (36.1)  | 225 (37.1) | 14,165 (25.2)    | 2,194 (29.0) | 526 (62.1)    | 176 (68.2) | 375 (19.7)         | 198 (21.3) | 160 (17.5)          | 64 (19.9)  |
| Smoking status                                  |                      |               |            |                  |              |               |            |                    |            |                     |            |
| <i>n</i> (%) missing                            | 372 (0.4)            | 26 (0.9)      | 5 (0.8)    | 236 (0.4)        | 21 (0.3)     | 16 (1.9)      | 4 (1.5)    | 17 (0.9)           | 11 (1.2)   | 10 (1.1)            | 5 (1.6)    |
| Never, <i>n</i> (%) <sup>a</sup>                | 60,061 (57.7)        | 1,281 (42.8)  | 262 (43.5) | 27,577 (49.1)    | 3,611 (47.8) | 299 (35.9)    | 89 (34.9)  | 897 (47.5)         | 419 (45.5) | 555 (61.3)          | 201 (63.2) |
| Former                                          | 35,126 (33.8)        | 1,024 (34.2)  | 196 (32.6) | 20,210 (36.0)    | 2,559 (33.8) | 237 (28.4)    | 74 (29.0)  | 690 (36.6)         | 337 (36.6) | 293 (32.3)          | 98 (30.8)  |
| Current                                         | 8,851 (8.5)          | 689 (23.0)    | 144 (23.9) | 8,402 (15.0)     | 1,392 (18.4) | 298 (35.7)    | 92 (36.1)  | 301 (15.9)         | 164 (17.8) | 58 (6.4)            | 19 (6.0)   |
| Alcohol frequency                               |                      |               |            |                  |              |               |            |                    |            |                     |            |
| <i>n</i> (%) missing                            | 75 (0.1)             | 22 (0.7)      | 4 (0.7)    | 157 (0.3)        | 28 (0.4)     | 13 (1.5)      | 2 (0.8)    | 5 (0.3)            | 4 (0.4)    | 4 (0.4)             | 1 (0.3)    |
| Daily/almost daily, <i>n</i> (%) <sup>a</sup>   | 22,026 (21.1)        | 561 (18.7)    | 99 (16.4)  | 10,801 (19.2)    | 1,361 (18.0) | 125 (14.9)    | 34 (13.2)  | 368 (19.4)         | 169 (18.2) | 178 (19.5)          | 62 (19.3)  |
| 3-4 times per week                              | 24,920 (23.9)        | 492 (16.4)    | 92 (15.3)  | 11,020 (19.6)    | 1,281 (17.0) | 84 (10.0)     | 24 (9.3)   | 342 (18.0)         | 149 (16.1) | 167 (18.3)          | 50 (15.5)  |
| 1-2 times per week                              | 26,928 (25.8)        | 641 (21.4)    | 126 (20.9) | 13,097 (23.3)    | 1,634 (21.6) | 161 (19.2)    | 53 (20.6)  | 447 (23.5)         | 214 (23.1) | 221 (24.2)          | 75 (23.3)  |
| 1-3 times per month                             | 11,266 (10.8)        | 355 (11.8)    | 75 (12.4)  | 7,031 (12.5)     | 938 (12.4)   | 79 (9.4)      | 22 (8.6)   | 232 (12.2)         | 120 (12.9) | 86 (9.4)            | 32 (9.9)   |
| Special occasions only                          | 11,449 (11.0)        | 473 (15.8)    | 99 (16.4)  | 8,153 (14.5)     | 1,207 (16.0) | 157 (18.8)    | 51 (19.8)  | 295 (15.5)         | 158 (17.0) | 124 (13.6)          | 55 (17.1)  |
| Never (former drinker)                          | 2,783 (2.7)          | 296 (9.9)     | 74 (12.3)  | 3,609 (6.4)      | 699 (9.3)    | 151 (18.0)    | 46 (17.9)  | 128 (6.7)          | 71 (7.7)   | 79 (8.7)            | 27 (8.4)   |
| Never (not former drinker)                      | 4,963 (4.8)          | 180 (6.0)     | 38 (6.3)   | 2,557 (4.5)      | 435 (5.8)    | 80 (9.6)      | 27 (10.5)  | 88 (4.6)           | 46 (5.0)   | 57 (6.3)            | 21 (6.5)   |
| Any psychotropic medication                     |                      |               |            |                  |              |               |            |                    |            |                     |            |
| <i>n</i> (%) missing                            | 1,180 (1.1)          | 40 (1.3)      | 3 (0.5)    | 949 (1.7)        | 58 (0.8)     | 23 (2.7)      | 7 (2.7)    |                    |            |                     |            |
| <i>n</i> (%) <sup>a</sup>                       | 1,424 (1.4)          | 1,663 (55.8)  | 542 (89.7) | 23,280 (42.0)    | 5,530 (73.5) | 688 (83.2)    | 231 (91.7) |                    |            |                     |            |
| Lithium                                         |                      |               |            |                  |              |               |            |                    |            |                     |            |
| <i>n</i> (%) missing                            |                      | 90 (3.0)      | 15 (2.5)   | 1,965 (3.5)      | 245 (3.2)    |               |            |                    |            |                     |            |
| <i>n</i> (%) <sup>a</sup>                       |                      | 501 (17.1)    | 209 (35.3) | 373 (0.7)        | 117 (1.6)    |               |            |                    |            |                     |            |
| Other mood stabiliser                           |                      |               |            |                  |              |               |            |                    |            |                     |            |
| <i>n</i> (%) missing                            |                      | 75 (2.5)      | 10 (1.7)   | 1,930 (3.4)      | 237 (3.1)    |               |            |                    |            |                     |            |
| <i>n</i> (%) <sup>a</sup>                       |                      | 531 (18.0)    | 267 (44.7) | 768 (1.4)        | 196 (2.7)    |               |            |                    |            |                     |            |
| SSRI antidepressant                             |                      |               |            |                  |              |               |            |                    |            |                     |            |
| <i>n</i> (%) missing                            |                      | 81 (2.7)      | 15 (2.5)   | 1,316 (2.3)      | 123 (1.6)    |               |            |                    |            |                     |            |
| <i>n</i> (%) <sup>a</sup>                       |                      | 508 (17.3)    | 102 (17.2) | 15,529 (28.2)    | 3,792 (50.8) |               |            |                    |            |                     |            |

|                                                 | Unexposed comparison | Mania/bipolar |            | Major depression |              | Schizophrenia |            | Multiple sclerosis |            | Parkinson's disease |            |
|-------------------------------------------------|----------------------|---------------|------------|------------------|--------------|---------------|------------|--------------------|------------|---------------------|------------|
|                                                 |                      | Broad         | Narrow     | Broad            | Narrow       | Broad         | Narrow     | Broad              | Narrow     | Broad               | Narrow     |
| Other antidepressant                            |                      |               |            |                  |              |               |            |                    |            |                     |            |
| n (%) missing                                   |                      | 90 (3.0)      | 16 (2.6)   | 1,625 (2.9)      | 180 (2.4)    |               |            |                    |            |                     |            |
| n (%) <sup>a</sup>                              |                      | 428 (14.6)    | 128 (21.7) | 7,239 (13.2)     | 1,737 (23.5) |               |            |                    |            |                     |            |
| Traditional antipsychotic                       |                      |               |            |                  |              |               |            |                    |            |                     |            |
| n (%) missing                                   |                      | 97 (3.2)      | 18 (3.0)   |                  |              | 57 (6.7)      | 17 (6.6)   |                    |            |                     |            |
| n (%) <sup>a</sup>                              |                      | 131 (4.5)     | 39 (6.6)   |                  |              | 174 (21.9)    | 62 (25.6)  |                    |            |                     |            |
| Second generation antipsychotic                 |                      |               |            |                  |              |               |            |                    |            |                     |            |
| n (%) missing                                   |                      | 82 (2.7)      | 12 (2.0)   |                  |              | 43 (5.1)      | 10 (3.9)   |                    |            |                     |            |
| n (%) <sup>a</sup>                              |                      | 470 (16.0)    | 205 (34.5) |                  |              | 439 (54.4)    | 169 (67.9) |                    |            |                     |            |
| Multiple sclerosis disease-modifying medication |                      |               |            |                  |              |               |            |                    |            |                     |            |
| n (%) missing                                   |                      |               |            |                  |              |               |            | 153 (8.0)          | 94 (10.1)  |                     |            |
| n (%) <sup>a</sup>                              |                      |               |            |                  |              |               |            | 175 (10.0)         | 120 (14.3) |                     |            |
| Parkinson's disease medication                  |                      |               |            |                  |              |               |            |                    |            |                     |            |
| n (%) missing                                   |                      |               |            |                  |              |               |            |                    |            | 58 (6.3)            | 11 (3.4)   |
| n (%) <sup>a</sup>                              |                      |               |            |                  |              |               |            |                    |            | 721 (84.0)          | 300 (96.2) |
| Neuroticism score                               |                      |               |            |                  |              |               |            |                    |            |                     |            |
| n (%) missing                                   | 17,114 (16.4)        | 665 (22.0)    | 130 (21.4) | 11,146 (19.8)    | 1,392 (18.4) | 223 (26.2)    | 67 (25.9)  | 442 (23.2)         | 219 (23.5) | 200 (21.8)          | 72 (22.3)  |
| Mean (SD)                                       | 3.3 (2.9)            | 6.8 (3.6)     | 7.1 (3.6)  | 6.4 (3.4)        | 7.4 (3.2)    | 6.8 (3.6)     | 6.9 (3.5)  | 4.6 (3.4)          | 4.5 (3.3)  | 4.1 (3.3)           | 4.4 (3.4)  |
| Current depressive symptom score                |                      |               |            |                  |              |               |            |                    |            |                     |            |
| n (%) missing                                   | 8,543 (8.2)          | 311 (10.3)    | 53 (8.7)   | 5,585 (9.9)      | 666 (8.8)    | 155 (18.2)    | 45 (17.4)  | 243 (12.8)         | 149 (16.0) | 113 (12.3)          | 39 (12.1)  |
| Mean (SD)                                       | 1.1 (1.6)            | 3.6 (3.3)     | 3.4 (3.2)  | 3.1 (3.0)        | 4.0 (3.4)    | 3.7 (3.3)     | 3.9 (3.3)  | 2.6 (2.4)          | 2.9 (2.5)  | 2.3 (2.4)           | 2.6 (2.5)  |

Abbreviations: Qu, quintile; SD, standard deviation; SSRI, selective serotonin reuptake inhibitor.

<sup>a</sup> Missing excluded from denominator.

<sup>b</sup> Quintiles generated from the whole UK Biobank cohort.
