# Supplementary material for: The ‘cognitive footprint’ of psychiatric and neurological conditions: cross‐sectional study in the UK Biobank cohort
Source: PubMed Central journal article supplement (PMC5434825; doi:10.1111/acps.12733), 2017-04-07
Supplement: ACPS-135-593-s007.pdf [file ACPS-135-593-s007.pdf]

**Table S2** Prevalence of Cognitive Impairment Across Groups, Standardised for Age Group, Gender and Educational Attainment

| Impairment threshold                          |                  | Mania/bipolar      |              | Major depression   |                    | Schizophrenia |                    | Multiple sclerosis |                    | Parkinson's disease |              |
|-----------------------------------------------|------------------|--------------------|--------------|--------------------|--------------------|---------------|--------------------|--------------------|--------------------|---------------------|--------------|
|                                               |                  | Broad              | Narrow       | Broad              | Narrow             | Broad         | Narrow             | Broad              | Narrow             | Broad               | Narrow       |
| <b>Reasoning</b>                              | <i>n</i>         | 1,866              | 318          | 35,211             | 6,052              | 274           | 86                 | 572                | 272                | 283                 | 115          |
| ≤ unexposed 4 <sup>th</sup> percentile score  | Standardised P % | 7.32               | 7.24         | 4.33               | 5.45               | 10.86         | <sup>b</sup>       | 3.29               | <sup>b</sup>       | 5.95                | 9.07         |
| (Unexposed prevalence 4.16%)                  | 95% CI           | 6.14, 8.50         | 4.39, 10.09  | 4.11, 4.54         | 4.88, 6.02         | 7.17, 14.54   |                    | 1.83, 4.75         |                    | 3.19, 8.70          | 3.82, 14.32  |
|                                               | Standardised PR  | 1.76*              | 1.74*        | 1.04 <sup>a</sup>  | 1.31*              | 2.61*         |                    | 0.79               |                    | 1.43                | 2.18*        |
|                                               | 95% CI           | 1.48, 2.11         | 1.13, 2.70   | 0.98, 1.10         | 1.16, 1.48         | 1.78, 3.82    |                    | 0.44, 1.42         |                    | 0.73, 2.81          | 1.01, 4.69   |
| <b>Reaction time</b>                          | <i>n</i>         | 2,955              | 593          | 55,773             | 7,484              | 798           | 243                | 1,866              | 906                | 897                 | 316          |
| > unexposed 95 <sup>th</sup> percentile score | Standardised P % | 7.22               | 8.72         | 5.53               | 7.02               | 13.50         | 11.45              | 15.34              | 19.27              | 6.27                | 5.98         |
| (Unexposed prevalence 4.98%)                  | 95% CI           | 6.29, 8.15         | 6.44, 10.99  | 5.34, 5.72         | 6.44, 7.60         | 11.13, 15.87  | 7.45, 15.46        | 13.70, 16.97       | 16.70, 21.84       | 4.69, 7.86          | 3.36, 8.59   |
|                                               | Standardised PR  | 1.45*              | 1.75*        | 1.11* <sup>c</sup> | 1.41* <sup>d</sup> | 2.71*         | 2.30*              | 3.08* <sup>e</sup> | 3.87* <sup>f</sup> | 1.26                | 1.20         |
|                                               | 95% CI           | 1.26, 1.68         | 1.30, 2.35   | 1.06, 1.17         | 1.28, 1.55         | 2.21, 3.32    | 1.52, 3.49         | 2.70, 3.52         | 3.30, 4.54         | 0.92, 1.71          | 0.73, 1.98   |
| <b>Numeric memory</b>                         | <i>n</i>         | 505                | 75           | 10,808             | 1,746              | 63            | 20                 | 193                | 103                | 94                  | 35           |
| ≤ unexposed 5 <sup>th</sup> percentile score  | Standardised P % | 10.07              | <sup>b</sup> | 5.85               | 7.88               | 19.42         | <sup>b</sup>       | 7.20               | <sup>b</sup>       | <sup>b</sup>        | <sup>b</sup> |
| (Unexposed prevalence 5.22%)                  | 95% CI           | 7.45, 12.70        |              | 5.40, 6.29         | 6.62, 9.15         | 9.65, 29.19   |                    | 3.56, 10.85        |                    |                     |              |
|                                               | Standardised PR  | 1.93*              |              | 1.12*              | 1.51*              | 3.72*         |                    | 1.38               |                    |                     |              |
|                                               | 95% CI           | 1.45, 2.58         |              | 1.01, 1.23         | 1.26, 1.82         | 2.20, 6.28    |                    | 0.69, 2.75         |                    |                     |              |
| <b>Pairs matching</b>                         | <i>n</i>         | 3,006              | 606          | 56,308             | 7,571              | 833           | 256                | 1,887              | 920                | 907                 | 321          |
| > unexposed 95 <sup>th</sup> percentile score | Standardised P % | 6.48               | 9.15         | 5.12               | 5.65               | 9.68          | 9.72               | 6.53               | 7.97               | 6.57                | 7.05         |
| (Unexposed prevalence 4.38%)                  | 95% CI           | 5.60, 7.36         | 6.86, 11.45  | 4.94, 5.31         | 5.13, 6.17         | 7.67, 11.69   | 6.09, 13.35        | 5.41, 7.64         | 6.22, 9.72         | 4.96, 8.18          | 4.25, 9.85   |
|                                               | Standardised PR  | 1.48*              | 2.09*        | 1.17*              | 1.29*              | 2.21*         | 2.22* <sup>g</sup> | 1.49*              | 1.82*              | 1.50*               | 1.61         |
|                                               | 95% CI           | 1.28, 1.72         | 1.59, 2.76   | 1.12, 1.23         | 1.16, 1.44         | 1.74, 2.82    | 1.38, 3.58         | 1.21, 1.83         | 1.39, 2.37         | 1.14, 1.98          | 0.98, 2.65   |
| <b>Prospective memory</b>                     | <i>n</i>         | 1,959              | 335          | 36,237             | 6,267              | 325           | 103                | 608                | 291                | 306                 | 124          |
| Incorrect score                               | Standardised P % | 29.89              | 36.74        | 22.82              | 25.56              | 44.50         | 42.22              | 26.24              | 29.89              | 27.84               | 35.60        |
| (Unexposed prevalence 22.82%)                 | 95% CI           | 27.87, 31.92       | 31.58, 41.90 | 22.39, 23.25       | 24.48, 26.64       | 39.10, 49.90  | 32.68, 51.76       | 22.75, 29.74       | 24.63, 35.15       | 22.82, 32.86        | 27.17, 44.03 |
|                                               | Standardised PR  | 1.31* <sup>h</sup> | 1.61*        | 1.00 <sup>i</sup>  | 1.12* <sup>j</sup> | 1.95*         | 1.85*              | 1.15               | 1.31*              | 1.22                | 1.56*        |
|                                               | 95% CI           | 1.22, 1.41         | 1.38, 1.86   | 0.98, 1.03         | 1.07, 1.17         | 1.71, 2.23    | 1.44, 2.37         | 0.99, 1.34         | 1.07, 1.60         | 0.98, 1.53          | 1.16, 2.09   |

Abbreviations: CI, confidence interval; P, prevalence; PR, prevalence ratio.

Standardised estimates are directly standardised by age, gender and education with reference to the unexposed comparison group.

\* Significant at  $P < 0.05$  (two-tailed).

<sup>a</sup> Significant interaction with gender: women PR = 0.95 (CI 0.88, 1.03); men PR = 1.13 (CI 1.03, 1.24).

<sup>b</sup> Estimates not reported because more than 3 of 8 strata contained no exposed participants with impairment.

<sup>c</sup> Significant interaction with gender: women PR = 1.04 (CI 0.98, 1.10); men PR = 1.21 (CI 1.12, 1.30).

<sup>d</sup> Significant interaction with gender: women PR = 1.28 (CI 1.14, 1.44); men PR = 1.57 (CI 1.34, 1.83).

<sup>e</sup> Significant interaction with age and gender: <60 years PR = 4.29 (CI 3.63, 5.09); ≥60 years PR = 2.43 (CI 1.99, 2.97); women PR = 2.53 (CI 2.20, 2.92); men PR = 3.78 (CI 3.06, 4.66).

<sup>f</sup> Significant interaction with age and gender: <60 years PR = 5.96 (CI 4.91, 7.24); ≥60 years PR = 2.75 (CI 2.12, 3.56); women PR = 2.96 (CI 2.46, 3.57); men PR = 5.01 (CI 3.94, 6.37).

<sup>g</sup> Significant interaction with education: no degree PR = 1.46 (CI 0.76, 2.82); has degree PR = 3.88 (CI 1.96, 7.68).

<sup>h</sup> Significant interaction with age: <60 years PR = 1.41 (CI 1.28, 1.54); ≥60 years PR = 1.24 (CI 1.11, 1.28).

<sup>i</sup> Significant interaction with gender and education: women PR = 0.97 (CI 0.94, 0.99); men PR = 1.04 (CI 1.01, 1.08); no degree PR = 1.03 (CI 0.99, 1.05); has degree = PR 0.94 (CI 0.89, 0.98).

<sup>j</sup> Significant interaction with gender: women PR = 1.06 (CI 0.99, 1.12); men PR = 1.19 (CI 1.10, 1.28).
