# Supplementary material for: The ‘cognitive footprint’ of psychiatric and neurological conditions: cross‐sectional study in the UK Biobank cohort
Source: PubMed Central journal article supplement (PMC5434825; doi:10.1111/acps.12733), 2017-04-07
Supplement: ACPS-135-593-s008.pdf [file ACPS-135-593-s008.pdf]

**Table S3** Prevalence of Cognitive Impairment in Alternative Versions of Mood Disorder Groups<sup>a</sup>

| Impairment threshold                                                          |                                                                               | Mania/bipolar      |              | Major depression   |                    |       |
|-------------------------------------------------------------------------------|-------------------------------------------------------------------------------|--------------------|--------------|--------------------|--------------------|-------|
|                                                                               |                                                                               | Broad              | Narrow       | Broad              | Narrow             |       |
| <b>Reasoning</b>                                                              | <i>n</i>                                                                      | 572                | 152          | 9,925              | 816                |       |
| ≤ unexposed 4 <sup>th</sup> percentile score<br>(Unexposed prevalence 4.16%)  | Crude prevalence %                                                            | 7.69               | 10.53        | 5.95               | 8.82               |       |
|                                                                               | 95% CI                                                                        | 5.51, 9.87         | 5.65, 15.41  | 5.48, 6.42         | 6.87, 10.77        |       |
|                                                                               | Crude prevalence ratio                                                        | 1.85*              | 2.53*        | 1.43*              | 2.12*              |       |
|                                                                               | 95% CI                                                                        | 1.39, 2.46         | 1.59, 4.03   | 1.32, 1.56         | 1.70, 2.65         |       |
|                                                                               | Standardised prevalence %                                                     | 7.61               | 11.15        | 6.07               | 9.24               |       |
|                                                                               | 95% CI                                                                        | 5.44, 9.79         | 6.15, 16.15  | 5.60, 6.54         | 7.25, 11.22        |       |
|                                                                               | Standardised prevalence ratio                                                 | 1.83*              | 2.68*        | 1.46* <sup>b</sup> | 2.22* <sup>c</sup> |       |
|                                                                               | 95% CI                                                                        | 1.37, 2.45         | 1.64, 4.37   | 1.34, 1.60         | 1.75, 2.80         |       |
|                                                                               | <b>Reaction time</b>                                                          | <i>n</i>           | 1,621        | 424                | 30,051             | 2,123 |
|                                                                               | > unexposed 95 <sup>th</sup> percentile score<br>(Unexposed prevalence 4.98%) | Crude prevalence % | 8.27         | 8.25               | 5.80               | 7.68  |
| 95% CI                                                                        |                                                                               | 6.93, 9.61         | 5.63, 10.87  | 5.54, 6.06         | 6.55, 8.81         |       |
| Crude prevalence ratio                                                        |                                                                               | 1.66*              | 1.66*        | 1.16*              | 1.54*              |       |
| 95% CI                                                                        |                                                                               | 1.41, 1.96         | 1.21, 2.28   | 1.10, 1.23         | 1.33, 1.79         |       |
| Standardised prevalence %                                                     |                                                                               | 8.62               | 9.51         | 6.13               | 8.12               |       |
| 95% CI                                                                        |                                                                               | 7.25, 9.98         | 6.72, 12.30  | 5.85, 6.40         | 6.96, 9.28         |       |
| Standardised prevalence ratio                                                 |                                                                               | 1.73*              | 1.91*        | 1.23* <sup>d</sup> | 1.63*              |       |
| 95% CI                                                                        |                                                                               | 1.46, 2.05         | 1.37, 2.66   | 1.17, 1.30         | 1.40, 1.91         |       |
| <b>Numeric memory</b>                                                         |                                                                               | <i>n</i>           | 152          | 37                 | 2,910              | 233   |
| ≤ unexposed 5 <sup>th</sup> percentile score<br>(Unexposed prevalence 5.22%)  |                                                                               | Crude prevalence % | 12.50        | 0.00               | 7.49               | 11.16 |
|                                                                               | 95% CI                                                                        | 7.24, 17.76        |              | 6.53, 8.45         | 7.12, 15.20        |       |
|                                                                               | Crude prevalence ratio                                                        | 2.40*              |              | 1.44*              | 2.14*              |       |
|                                                                               | 95% CI                                                                        | 1.57, 3.66         |              | 1.25, 1.65         | 1.48, 3.08         |       |
|                                                                               | Standardised prevalence %                                                     | 12.95              |              | 7.51               | 11.07              |       |
|                                                                               | 95% CI                                                                        | 7.61, 18.28        |              | 6.56, 8.47         | 7.04, 15.09        |       |
|                                                                               | Standardised prevalence ratio                                                 | 2.48*              |              | 1.44*              | 2.12*              |       |
|                                                                               | 95% CI                                                                        | 1.61, 3.81         |              | 1.24, 1.66         | 1.40, 3.21         |       |
| <b>Pairs matching</b>                                                         | <i>n</i>                                                                      | 1,651              | 434          | 30,365             | 2,151              |       |
| > unexposed 95 <sup>th</sup> percentile score<br>(Unexposed prevalence 4.38%) | Crude prevalence %                                                            | 7.63               | 7.37         | 5.37               | 6.51               |       |
|                                                                               | 95% CI                                                                        | 6.35, 8.91         | 4.91, 9.83   | 5.12, 5.62         | 5.47, 7.55         |       |
|                                                                               | Crude prevalence ratio                                                        | 1.74*              | 1.68*        | 1.23*              | 1.49*              |       |
|                                                                               | 95% CI                                                                        | 1.47, 2.07         | 1.20, 2.35   | 1.16, 1.30         | 1.26, 1.75         |       |
|                                                                               | Standardised prevalence %                                                     | 7.80               | 8.23         | 5.87               | 7.05               |       |
|                                                                               | 95% CI                                                                        | 6.50, 9.09         | 5.65, 10.82  | 5.60, 6.13         | 5.97, 8.13         |       |
|                                                                               | Standardised prevalence ratio                                                 | 1.78* <sup>e</sup> | 1.88*        | 1.34*              | 1.61*              |       |
|                                                                               | 95% CI                                                                        | 1.50, 2.12         | 1.33, 2.67   | 1.26, 1.42         | 1.36, 1.90         |       |
|                                                                               | <b>Prospective memory</b>                                                     | <i>n</i>           | 614          | 165                | 10,395             | 877   |
|                                                                               | Incorrect score<br>(Unexposed prevalence 22.82%)                              | Crude prevalence % | 36.64        | 41.21              | 26.35              | 31.58 |
| 95% CI                                                                        |                                                                               | 32.83, 40.45       | 33.70, 48.72 | 25.50, 27.20       | 28.50, 34.66       |       |
| Crude prevalence ratio                                                        |                                                                               | 1.61*              | 1.81*        | 1.15*              | 1.38*              |       |
| 95% CI                                                                        |                                                                               | 1.45, 1.78         | 1.50, 2.17   | 1.12, 1.19         | 1.25, 1.53         |       |
| Standardised prevalence %                                                     |                                                                               | 36.74              | 42.67        | 27.16              | 33.09              |       |
| 95% CI                                                                        |                                                                               | 32.93, 40.55       | 35.13, 50.22 | 26.30, 28.01       | 29.97, 36.20       |       |
| Standardised prevalence ratio                                                 |                                                                               | 1.61* <sup>f</sup> | 1.87*        | 1.19* <sup>g</sup> | 1.45* <sup>h</sup> |       |
| 95% CI                                                                        |                                                                               | 1.45, 1.79         | 1.54, 2.26   | 1.15, 1.23         | 1.32, 1.61         |       |

Abbreviations: CI, confidence interval.

Standardised estimates are directly standardised by age and gender with reference to the unexposed comparison group.

\* Significant at  $P < 0.05$  (two-tailed).

<sup>a</sup> Exposure groups formed without reference to mood disorder questionnaire data.

<sup>b</sup> Significant interaction with gender: women ratio = 1.31 (CI 1.18, 1.46); men ratio = 1.62 (CI 1.41, 1.87).

<sup>c</sup> Significant interaction with gender: women ratio = 1.65 (CI 1.20, 2.29); men ratio = 2.84 (CI 2.05, 3.92).

<sup>d</sup> Significant interaction with age and gender: <60 years ratio = 1.42 (CI 1.31, 1.54); ≥60 years ratio = 1.13 (CI 1.05, 1.22); women ratio = 1.13 (CI 1.05, 1.21); men ratio = 1.36 (CI 1.25, 1.49).

<sup>e</sup> Significant interaction with age: <60 years ratio = 2.17 (CI 1.74, 2.72); ≥60 years ratio = 1.52 (CI 1.16, 1.98).

<sup>f</sup> Significant interaction with age: <60 years ratio = 1.79 (CI 1.55, 2.07); ≥60 years ratio = 1.46 (CI 1.25, 1.71).

<sup>g</sup> Significant interaction with age and gender: <60 years ratio = 1.25 (CI 1.19, 1.32); ≥60 years ratio = 1.13 (CI 1.08, 1.19); women ratio = 1.12 (CI 1.07, 1.17); men ratio = 1.26 (CI 1.19, 1.34).

<sup>h</sup> Significant interaction with gender: women ratio = 1.31 (CI 1.15, 1.49); men ratio = 1.61 (CI 1.39, 1.88).
